# Supplementary material
Source: publisher site journal article supplement (https://www.spandidos-publications.com/6558/downloadSupplementary)

Figure S1. FRRT alleviates ethanol-induced hepatic oxidative stress in AML-12 cells. (A) The MDA level in AML-12 cells. (B-D) The activities of CAT, SOD and GSH in AML-12 cells. In both (A) and (B), \* $P < 0.05$  and \*\*\* $P < 0.001$  compared with the NC group; # $P < 0.05$ , ## $P < 0.01$  and ### $P < 0.001$  compared with the EtOH group. FRRT, fermented *Rosa roxburghii* Tratt; MDA, malondialdehyde; SOD, superoxide dismutase; CAT, catalase; GSH, glutathione; NC, negative control; RRT, unfermented *Rosa roxburghii* Tratt; ns, no significance.

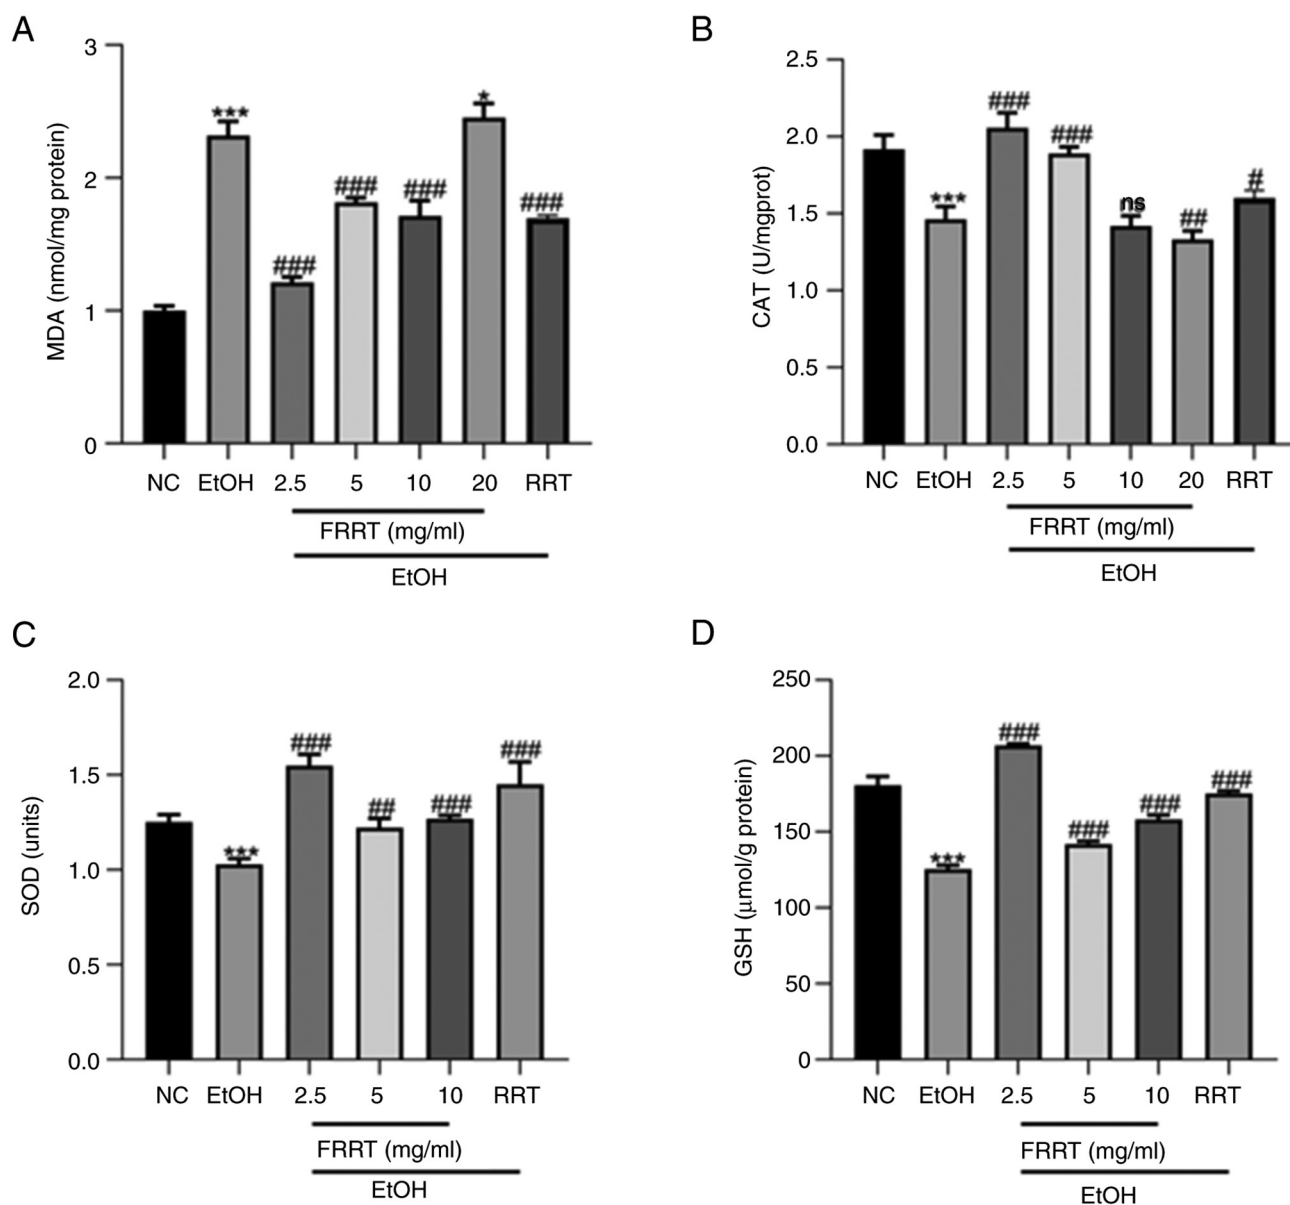

Supplement: Supplementary file 1 [file downloadSupplementary]
